# Supplementary material for: A unique mating strategy without physical contact during fertilization in Bombay Night Frogs (Nyctibatrachus humayuni) with the description of a new form of amplexus and female call
Source: PubMed Central journal article supplement (PMC4911947; doi:10.7717/peerj.2117), 2016-06-14
Supplement: peerj-04-2117-s014.pdf [file peerj-04-2117-s014.pdf]

Figure S1

Bert Willaert, Robin Suyesh, Sonali Garg, Varad B Giri, Mark A Bee and SD Biju

**A unique mating strategy without physical contact during fertilization in Bombay Night Frog (*Nyctibatrachus humayuni*) with the description of a new form of amplexus and female call**

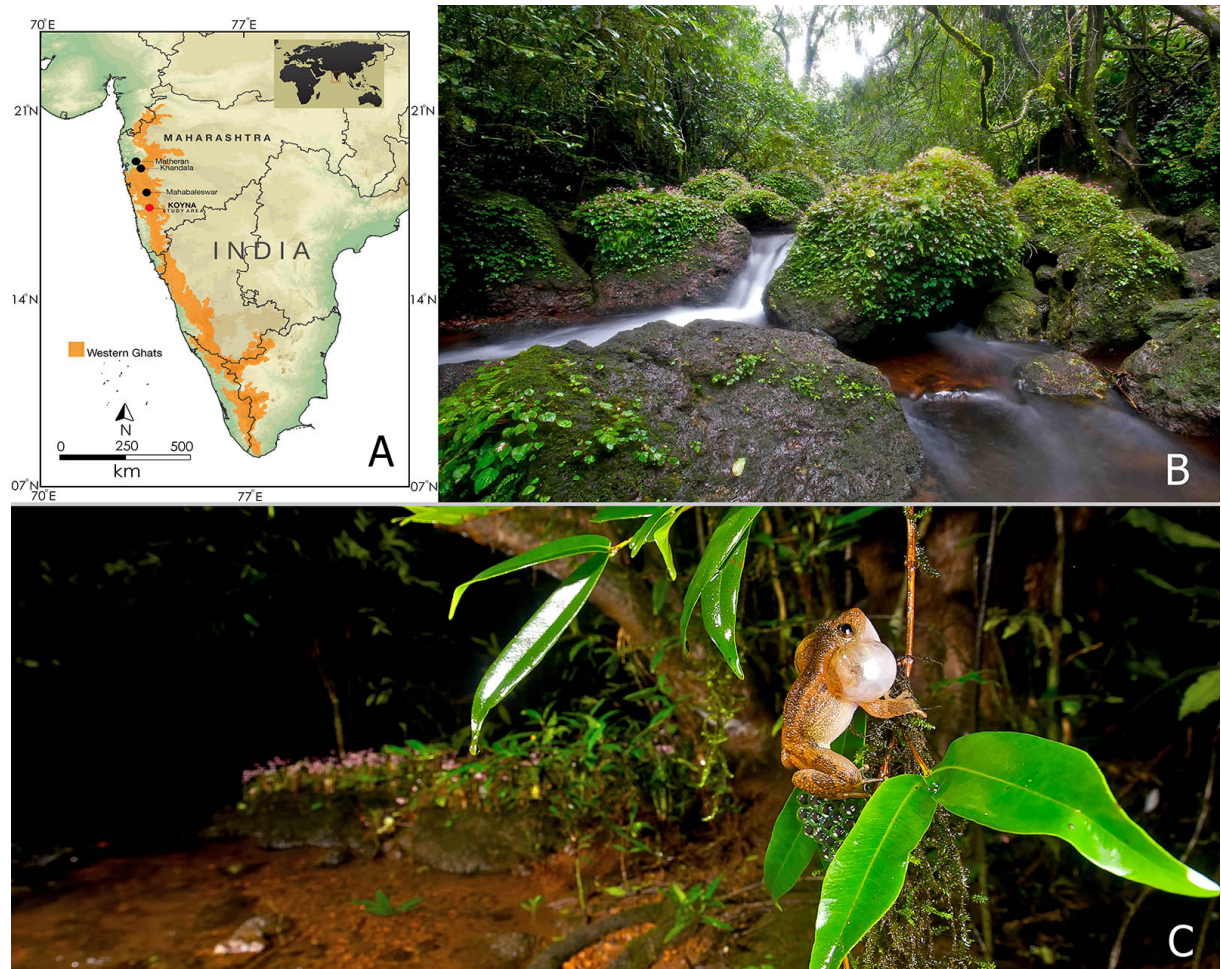

**Figure S1** Study site and breeding habitat of *Nyctibatrachus humayuni*. (A) Distribution of *N. humayuni* in the Western Ghats of India. Study site is marked in red. (B) A mountain stream flowing over laterite rocks with overhanging vegetation, which is the typical breeding habitat of *N. humayuni* in the forest at Humbarli village, Koyna. (C) An adult male of *N. humayuni* is seen calling from overhanging vegetation.
