# Supplementary material for: A unique mating strategy without physical contact during fertilization in Bombay Night Frogs (Nyctibatrachus humayuni) with the description of a new form of amplexus and female call
Source: PubMed Central journal article supplement (PMC4911947; doi:10.7717/peerj.2117), 2016-06-14
Supplement: peerj-04-2117-s015.pdf [file peerj-04-2117-s015.pdf]

Supplemental Information

**Figure S2**

Bert Willaert, Robin Suyesh, Sonali Garg, Varad B Giri, Mark A Bee and SD Biju

**A unique mating strategy without physical contact during fertilization in Bombay Night Frog (*Nyctibatrachus humayuni*) with the description of a new form of amplexus and female call**

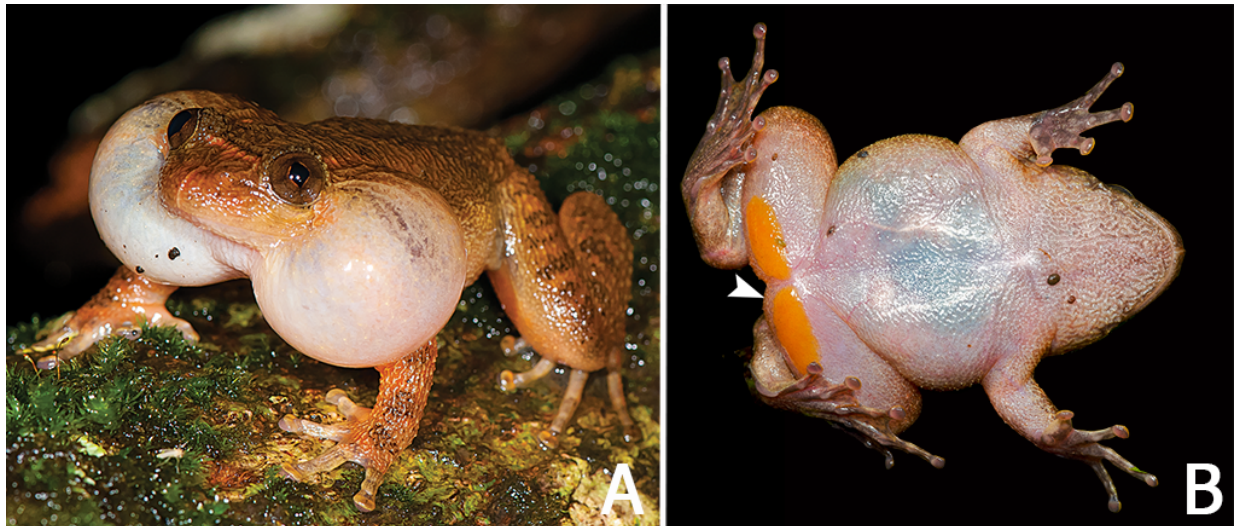

**Figure S2** An adult male of *Nyctibatrachus humayuni* (in life). (A) Male calling from a fallen tree trunk. (B) Ventral view showing bright orange coloured femoral glands, indicated by an arrow.
